# Supplementary material
Source: publisher figshare collection journal article supplement (https://acs.figshare.com/ndownloader/files/3819334)
Supplement: Supplementary file 1 [file 3819334]

## Effect of Hydrate Saturation on the Methane Hydrate Dissociation by Depressurization in Sediments in a Cubic Hydrate Simulator

Yu Zhang<sup>a,b</sup>, Xiao-Sen Li<sup>a,b,\*</sup>, Zhao-Yang Chen<sup>a,b</sup>, Yi Wang<sup>a,b</sup>, Xu-Ke Ruan<sup>a,b</sup>

<sup>a</sup> Key Laboratory of Gas Hydrate, Guangzhou Institute of Energy Conversion, Chinese Academy of Sciences, Guangzhou 510640, P. R. China.,

<sup>b</sup> Guangzhou Center for Gas Hydrate Research, Chinese Academy of Sciences, Guangzhou 510640, P. R. China.

\* Corresponding author. Tel: +86 20 87057037; Fax: +86 20 87034664.

E-mail address: [lixs@ms.giec.ac.cn](mailto:lixs@ms.giec.ac.cn)

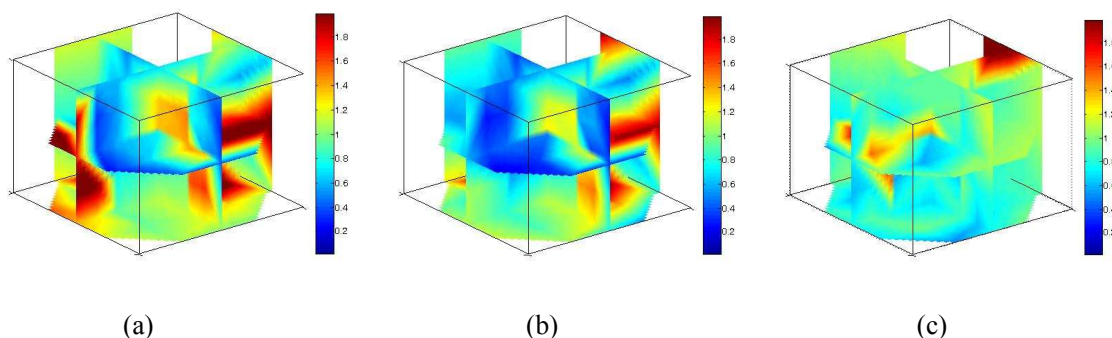

Figure 1 Resistance ratio spatial distributions at different time in the  
steady-pressure period for run 1

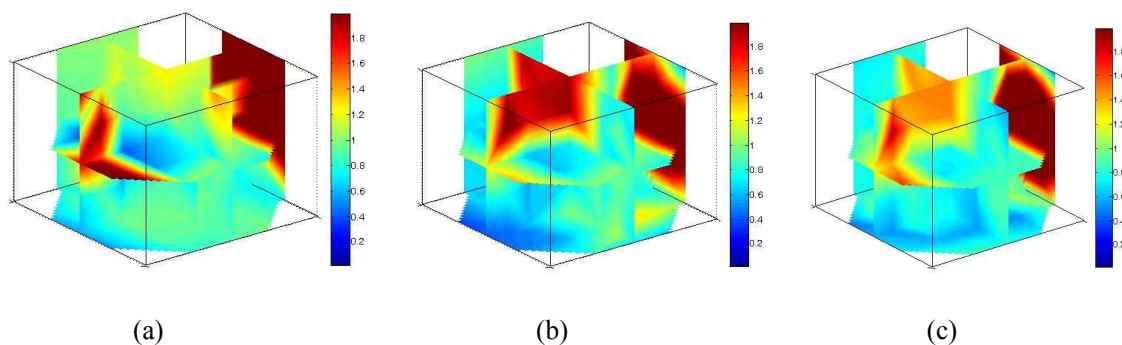

Figure 2 Resistance ratio spatial distributions at different time in the  
steady-pressure period for run 2

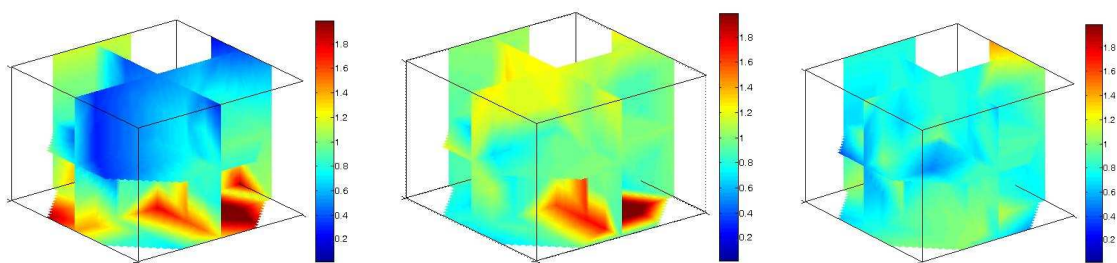

(a) (b) (c)

Figure 3 Resistance ratio spatial distributions at different time in the steady-pressure period for run 3

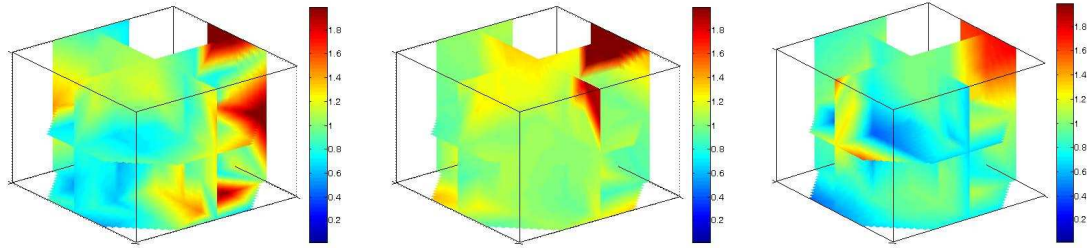

(a) (b) (c)

Figure 4 Resistance ratio spatial distributions at different time in the steady-pressure period for run 4

Figures 1-4 give the resistance ratio spatial distributions at different time in the steady-pressure period for different experimental runs. In each figure, (a), (b) and (c) represent the resistance ratio spatial distributions at the time when 20% , 60% and 100% of the gas production in the steady-pressure period has been produced, respectively. The resistance ratio is the ratio of the resistance at different time to the resistance at the beginning of the steady-pressure period.
